# Supplementary material for: Breastfeeding Status and Duration and Infections, Hospitalizations for Infections, and Antibiotic Use in the First Two Years of Life in the ELFE Cohort
Source: MDPI journal article supplement (doi:10.3390/nu11071607), 2019-07-15
Supplement: s1 [file s1]

Table S1: Details regarding variables used for the multiple imputations

| Used variable                                        | Type of variable           | Model used to predict missing data | Missing values |
|------------------------------------------------------|----------------------------|------------------------------------|----------------|
| Hospital admission                                   | Binary                     | Logistic regression                | 0%             |
| Hospital admission from infections                   | Binary                     | Logistic regression                | 0%             |
| Hospital admission from fever                        | Binary                     | Logistic regression                | 0%             |
| Hospital admission from diarrhea                     | Binary                     | Logistic regression                | 0%             |
| Hospital admission from bronchiolitis                | Binary                     | Logistic regression                | 0%             |
| Hospital admission events                            | Continuous                 | Linear regression                  | 0%             |
| Total hospital admission duration                    | Continuous                 | Linear regression                  | 0%             |
| Bronchiolitis events                                 | Ordinal (3 categories)     | Multinomial regression             | 0%             |
| Otitis events                                        | Ordinal (3 categories)     | Multinomial regression             | 0%             |
| Food allergy in the first 2 years of life            | Binary                     | Logistic regression                | 0%             |
| Hospital admission in the first 2 months of life     | Binary                     | Logistic regression                | 0%             |
| Antibiotic use events                                | Ordinal (4 categories)     | Multinomial regression             | 0%             |
| Any breastfeeding duration                           | Continuous                 | Linear regression                  | 0%             |
| Household composition                                | Categorical (3 categories) | Multinomial regression             | 0%             |
| Maternal age at birth                                | Continuous                 | Linear regression                  | 0%             |
| Birth order                                          | Continuous                 | Linear regression                  | 0%             |
| Employment status before pregnancy                   | Categorical (3 categories) | Multinomial regression             | 0%             |
| Mother's region of residence                         | Categorical (9 categories) | Multinomial regression             | 0%             |
| Maternity unity level                                | Ordinal (5 categories)     | Multinomial regression             | 0%             |
| Wave of recruitment                                  | Ordinal (4 categories)     | Multinomial regression             | 0%             |
| Educational level                                    | Continuous                 | Linear regression                  | 0%             |
| Maternal place of birth                              | Binary                     | Logistic regression                | 0%             |
| Predominant breastfeeding duration                   | Continuous                 | Linear regression                  | 0%             |
| Gestational age                                      | Continuous                 | Linear regression                  | 1%             |
| Caesarean section                                    | Categorical (3 categories) | Multinomial regression             | 1%             |
| Sex                                                  | Binary                     | Logistic regression                | 1%             |
| Milk feeding type at 2 months                        | Ordinal (9 categories)     | Logistic regression                | 1%             |
| Maternal smoking during pregnancy                    | Categorical (4 categories) | Multinomial regression             | 1%             |
| Maternal BMI                                         | Continuous                 | Linear regression                  | 1%             |
| Monthly Family income                                | Continuous                 | Linear regression                  | 1%             |
| Age at first attendance to shared childcare facility | Ordinal (4 categories)     | Logistic regression                | 4%             |

Table S2: Comparison of included and excluded families (Chi-squared and Student *t*-tests

|                                                       | <i>Selected</i>     | <i>Excluded</i>    |
|-------------------------------------------------------|---------------------|--------------------|
| <b>Duration of total any breastfeeding (months)</b>   | 4.0± 5.6 (10349)    | 2.9 ± 4.4 (7652)   |
| <b>Duration of predominant breastfeeding (months)</b> | 2.2 ± 3.5 (10337)   | 1.3 ± 2.6 (7790)   |
| <b>Maternal age at birth (years)</b>                  | 30.7 ± 4.7 (10349)  | 29.6 ± 5.4 (7875)  |
| <b>Place of Birth</b>                                 |                     |                    |
| France                                                | 91.0% (9415)        | 82.6% (5114)       |
| Abroad                                                | 9.0% (934)          | 17.4% (1075)       |
| <b>Pre-pregnancy BMI (kg/m<sup>2</sup>)</b>           | 23.4 ± 4.7 (10349)  | 23.6 ± 5.0 (7553)  |
| <b>Education level</b>                                |                     |                    |
| Below secondary school                                | 5.2% (534)          | 12.8% (776)        |
| Secondary school                                      | 11.6% (1200)        | 20.1% (1223)       |
| High school                                           | 17.9% (1851)        | 20.1% (1219)       |
| 2-y university degree                                 | 24.0% (2480)        | 18.3% (1113)       |
| 3-y university degree                                 | 19.8% (2045)        | 12.9% (781)        |
| 5-y university degree or more                         | 21.6% (2239)        | 15.8% (959)        |
| <b>Employment status before pregnancy</b>             |                     |                    |
| Employed                                              | 76.5% (7920)        | 61.8% (4799)       |
| Unemployed                                            | 23.5% (2429)        | 38.2% (2971)       |
| <b>Household composition</b>                          |                     |                    |
| Traditional                                           | 89.7% (9283)        | 82.9% (5133)       |
| Single parenthood                                     | 2.8% (293)          | 8.2% (509)         |
| Step family                                           | 7.5% (773)          | 8.9% (553)         |
| <b>Household monthly income (€)</b>                   | 3507 ± 3368 (10349) | 3129 ± 2319 (5525) |
| <b>Smoking status during pregnancy</b>                |                     |                    |

|                                                             |                    |                   |
|-------------------------------------------------------------|--------------------|-------------------|
| Never smoker                                                | 57.7% (5968)       | 56.5% (4308)      |
| Only before pregnancy                                       | 25.0% (2583)       | 19.6% (1493)      |
| Only in early pregnancy                                     | 3.6% (373)         | 4.5% (344)        |
| Throughout pregnancy                                        | 13.8% (1425)       | 19.4% (1482)      |
| <b>Caesarean section</b>                                    |                    |                   |
| No                                                          | 82.8% (8572)       | 80.0% (6182)      |
| Yes                                                         | 17.2% (1777)       | 20.1% (1550)      |
| <b>Gestational age (weeks)</b>                              | 39.7 ± 1.4 (10349) | 39.4 ± 1.6 (7589) |
| <b>Sex</b>                                                  |                    |                   |
| Boys                                                        | 49.6% (5130)       | 53.73% (4137)     |
| Girl                                                        | 50.4% (5219)       | 46.2% (3551)      |
| <b>Birth order</b>                                          |                    |                   |
| First born                                                  | 44.4% (4599)       | 45.3% (3572)      |
| Second born                                                 | 87.1% (3841)       | 33.2% (2617)      |
| Third born                                                  | 13.8% (1427)       | 13.9% (1093)      |
| Fourth born or more                                         | 4.7% (482)         | 7.6% (596)        |
| <b>Age at first attendance to shared childcare facility</b> |                    |                   |
| ≤ 2 months                                                  | 5.2% (535)         | 8.5% (126)        |
| > 2 months to 4 months                                      | 19.4% (2008)       | 31.9% (471)       |
| > 4 months to 6 months                                      | 10.2% (1059)       | 16.6% (246)       |
| > 6 months to 12 months                                     | 11.2% (1157)       | 27.9% (412)       |
| Never attended in the first year                            | 54.0% (5590)       | 15.1% (223)       |

% (n) or mean ± sd (n)

All p-values <0.0001

Table S3: Multivariate adjusted analyses assessing breastfeeding and parent reports of hospitalizations from infection among infants without hospitalization events before 2 months of age ( $n = 9,703$ )

| <i>Parental-report of hospitalisations from infection</i> |                               |                    |      |                              |                    |      |                    |      |                    |      |                    |      |
|-----------------------------------------------------------|-------------------------------|--------------------|------|------------------------------|--------------------|------|--------------------|------|--------------------|------|--------------------|------|
|                                                           | Number of events (ref = None) |                    |      | Total duration (ref = Never) |                    |      | Causes             |      |                    |      |                    |      |
|                                                           | 1                             | ≥ 2                | p    | 1-3 nights                   | ≥ 4 nights         | p    | Fever              | p    | Gastroint. Inf.    | p    | Bronchiolitis      | p    |
| <b>Number of infants in each group</b>                    | 589                           | 235                |      | 311                          | 207                |      | 163                |      | 325                |      | 240                |      |
| <b>Any breastfeeding status</b>                           |                               |                    | 0.18 |                              |                    | 0.15 |                    | 0.22 |                    | 0.30 |                    | 0.81 |
| Never                                                     | 1 [Ref]                       | 1 [Ref]            |      | 1 [Ref]                      | 1 [Ref]            |      | 1 [Ref]            |      | 1 [Ref]            |      | 1 [Ref]            |      |
| Ever                                                      | 1.17 [0.95 ; 1.44]            | 0.86 [0.64 ; 1.16] |      | 1.23 [0.93 ; 1.63]           | 0.81 [0.59 ; 1.12] |      | 1.28 [0.86 ; 1.9]  |      | 1.15 [0.88 ; 1.51] |      | 0.96 [0.71 ; 1.30] |      |
| <b>Any breastfeeding duration</b>                         |                               |                    | 0.55 |                              |                    | 0.55 |                    | 0.71 |                    | 0.14 |                    | 0.03 |
| Never                                                     | 1 [Ref]                       | 1 [Ref]            |      | 1 [Ref]                      | 1 [Ref]            |      | 1 [Ref]            |      | 1 [Ref]            |      | 1 [Ref]            |      |
| <1 month                                                  | 1.16 [0.89 ; 1.52]            | 0.92 [0.61 ; 1.37] |      | 1.25 [0.87 ; 1.80]           | 0.79 [0.51 ; 1.23] |      | 1.28 [0.77 ; 2.12] |      | 1.47 [1.05 ; 2.05] |      | 0.69 [0.44 ; 1.09] |      |
| 1 to <3 months                                            | 1.28 [0.98 ; 1.68]            | 0.95 [0.63 ; 1.43] |      | 1.21 [0.83 ; 1.77]           | 0.96 [0.62 ; 1.47] |      | 1.45 [0.87 ; 2.42] |      | 0.96 [0.66 ; 1.41] |      | 1.29 [0.88 ; 1.90] |      |
| 3 to <6 months                                            | 1.23 [0.95 ; 1.61]            | 0.79 [0.52 ; 1.19] |      | 1.39 [0.97 ; 1.98]           | 0.80 [0.52 ; 1.24] |      | 1.22 [0.74 ; 2.04] |      | 1.07 [0.74 ; 1.53] |      | 1.16 [0.79 ; 1.71] |      |
| ≥ 6 months                                                | 1.05 [0.80 ; 1.36]            | 0.80 [0.53 ; 1.19] |      | 1.09 [0.75 ; 1.57]           | 0.74 [0.49 ; 1.13] |      | 1.20 [0.74 ; 1.97] |      | 1.09 [0.77 ; 1.55] |      | 0.76 [0.50 ; 1.16] |      |
| <b>Number of infants in each group</b>                    | 587                           | 235                |      | 310                          | 206                |      | 163                |      | 323                |      | 240                |      |
| <b>Predominant breastfeeding status</b>                   |                               |                    | 0.21 |                              |                    | 0.16 |                    | 0.65 |                    | 0.75 |                    | 0.61 |
| Never                                                     | 1 [Ref]                       | 1 [Ref]            |      | 1 [Ref]                      | 1 [Ref]            |      | 1 [Ref]            |      | 1 [Ref]            |      | 1 [Ref]            |      |
| Ever                                                      | 1.13 [0.93 ; 1.36]            | 0.84 [0.64 ; 1.12] |      | 1.11 [0.86 ; 1.43]           | 0.77 [0.58 ; 1.04] |      | 1.08 [0.77 ; 1.53] |      | 1.04 [0.81 ; 1.33] |      | 1.08 [0.81 ; 1.43] |      |
| <b>Predominant breastfeeding duration</b>                 |                               |                    | 0.62 |                              |                    | 0.39 |                    | 0.74 |                    | 0.27 |                    | 0.65 |
| Never                                                     | 1 [Ref]                       | 1 [Ref]            |      | 1 [Ref]                      | 1 [Ref]            |      | 1 [Ref]            |      | 1 [Ref]            |      | 1 [Ref]            |      |
| <1 month                                                  | 1.22 [0.96 ; 1.54]            | 0.89 [0.61 ; 1.30] |      | 1.27 [0.92 ; 1.75]           | 0.81 [0.54 ; 1.21] |      | 1.22 [0.79 ; 1.89] |      | 1.25 [0.92 ; 1.69] |      | 1.09 [0.75 ; 1.59] |      |

|                 |                    |                    |                    |                    |                    |                    |                    |
|-----------------|--------------------|--------------------|--------------------|--------------------|--------------------|--------------------|--------------------|
| 1 to < 3 months | 1.19 [0.94 ; 1.51] | 0.85 [0.59 ; 1.25] | 1.02 [0.73 ; 1.42] | 0.94 [0.63 ; 1.38] | 1.16 [0.74 ; 1.82] | 1.06 [0.77 ; 1.46] | 1.15 [0.80 ; 1.66] |
| 3 to < 6 months | 1.03 [0.79 ; 1.33] | 0.79 [0.53 ; 1.18] | 1.09 [0.77 ; 1.54] | 0.61 [0.39 ; 0.95] | 0.89 [0.55 ; 1.47] | 0.88 [0.62 ; 1.25] | 1.12 [0.77 ; 1.65] |
| ≥ 6 months      | 0.97 [0.69 ; 1.34] | 0.82 [0.49 ; 1.36] | 1.01 [0.64 ; 1.59] | 0.69 [0.40 ; 1.19] | 0.95 [0.52 ; 1.74] | 0.80 [0.51 ; 1.28] | 0.75 [0.43 ; 1.32] |

*OR [CI 95%] multinomial logistic regressions adjusted for maternal age at first child, education level, employment status, smoking status during pregnancy and pre-pregnancy BMI, household monthly income per consumption unit,*

*household composition, caesarean section and infant's sex, gestational age, birth order and age at first attendance to shared childcare facility, recruitment wave, maternity unit size and level, and mother's region of residence*

*Analyses were performed separately for each breastfeeding definition*

Table S4: Multivariate adjusted analyses assessing breastfeeding and parent reports of bronchiolitis events, otitis events, and antibiotic use among infants without hospitalization events before 2 months of age ( $n = 9,703$ )

|                                           | <i>Parental-report</i> |                    |      |                    |      |                    |                    |                    |
|-------------------------------------------|------------------------|--------------------|------|--------------------|------|--------------------|--------------------|--------------------|
|                                           | Bronchiolitis events   |                    |      | Otitis events      |      | Antibiotic use     |                    |                    |
|                                           | (ref = None)           |                    | p    | (ref = < 3)        |      | (ref = never)      |                    | p                  |
|                                           | 1 – 2                  | ≥ 3                |      | ≥ 3                | p    | Once               | 2 to 3 times       | > 3 times          |
| <b>Number of infants in each group</b>    | 5949                   | 1112               |      | 2399               |      | 1855               | 1744               | 4046               |
| <b>Any breastfeeding status</b>           |                        |                    | 0.10 |                    | 0.33 |                    |                    | 0.06               |
| Never                                     | 1 [Ref]                | 1 [Ref]            |      | 1 [Ref]            |      | 1 [Ref]            | 1 [Ref]            | 1 [Ref]            |
| Ever                                      | 1.13 [1.01 ; 1.26]     | 1.06 [0.89 ; 1.26] |      | 1.06 [0.94 ; 1.19] |      | 0.94 [0.80 ; 1.10] | 0.87 [0.74 ; 1.01] | 0.84 [0.74 ; 0.96] |
| <b>Any breastfeeding duration</b>         |                        |                    | 0.13 |                    | 0.60 |                    |                    | 0.00               |
| Never                                     | 1 [Ref]                | 1 [Ref]            |      | 1 [Ref]            |      | 1 [Ref]            | 1 [Ref]            | 1 [Ref]            |
| <1 month                                  | 1.09 [0.94 ; 1.27]     | 1.14 [0.90 ; 1.43] |      | 1.10 [0.94 ; 1.28] |      | 0.96 [0.77 ; 1.19] | 1.04 [0.84 ; 1.28] | 1.09 [0.91 ; 1.30] |
| 1 to < 3 months                           | 1.10 [0.94 ; 1.28]     | 1.02 [0.81 ; 1.29] |      | 1.10 [0.94 ; 1.28] |      | 1.04 [0.84 ; 1.29] | 0.98 [0.79 ; 1.22] | 0.98 [0.81 ; 1.17] |
| 3 to < 6 months                           | 1.18 [1.02 ; 1.37]     | 1.18 [0.95 ; 1.48] |      | 1.05 [0.91 ; 1.22] |      | 1.02 [0.84 ; 1.25] | 0.80 [0.65 ; 0.99] | 0.81 [0.68 ; 0.96] |
| ≥ 6 months                                | 1.14 [0.99 ; 1.31]     | 0.92 [0.74 ; 1.15] |      | 1.00 [0.87 ; 1.16] |      | 0.80 [0.66 ; 0.97] | 0.73 [0.61 ; 0.89] | 0.64 [0.54 ; 0.75] |
| <b>Number of infants in each group</b>    | 5945                   | 1111               |      | 2398               |      | 1851               | 1742               | 4045               |
| <b>Predominant breastfeeding status</b>   |                        |                    | 0.21 |                    | 0.92 |                    |                    | 0.00               |
| Never                                     | 1 [Ref]                | 1 [Ref]            |      | 1 [Ref]            |      | 1 [Ref]            | 1 [Ref]            | 1 [Ref]            |
| Ever                                      | 1.09 [0.99 ; 1.21]     | 1.04 [0.89 ; 1.21] |      | 1.00 [0.90 ; 1.10] |      | 0.95 [0.82 ; 1.10] | 0.84 [0.73 ; 0.97] | 0.8 [0.71 ; 0.91]  |
| <b>Predominant breastfeeding duration</b> |                        |                    | 0.12 |                    | 0.99 |                    |                    | 0.00               |
| Never                                     | 1 [Ref]                | 1 [Ref]            |      | 1 [Ref]            |      | 1 [Ref]            | 1 [Ref]            | 1 [Ref]            |

|                 |                    |                    |                    |                    |                    |                    |
|-----------------|--------------------|--------------------|--------------------|--------------------|--------------------|--------------------|
| <1 month        | 1.09 [0.95 ; 1.25] | 1.16 [0.94 ; 1.42] | 1.00 [0.87 ; 1.15] | 1.10 [0.90 ; 1.33] | 1.05 [0.87 ; 1.27] | 0.97 [0.82 ; 1.15] |
| 1 to < 3 months | 1.14 [1.00 ; 1.31] | 1.06 [0.86 ; 1.31] | 0.99 [0.87 ; 1.14] | 0.93 [0.77 ; 1.12] | 0.82 [0.68 ; 0.99] | 0.87 [0.74 ; 1.02] |
| 3 to < 6 months | 1.13 [0.98 ; 1.30] | 1.03 [0.83 ; 1.27] | 0.98 [0.85 ; 1.12] | 0.88 [0.73 ; 1.06] | 0.71 [0.59 ; 0.86] | 0.66 [0.57 ; 0.78] |
| ≥ 6 months      | 0.96 [0.81 ; 1.13] | 0.78 [0.59 ; 1.03] | 1.02 [0.86 ; 1.21] | 0.89 [0.71 ; 1.12] | 0.77 [0.61 ; 0.96] | 0.65 [0.54 ; 0.80] |

*OR [CI 95%] multinomial logistic regressions adjusted for maternal age at first child, education level, employment status, smoking status during pregnancy and pre-pregnancy BMI, household monthly income per consumption unit, household composition, caesarean section and infant's sex, gestational age, birth order and age at first attendance to shared childcare facility, recruitment wave, maternity unit size and level, and mother's region of residence*

*Analyses were performed separately for each breastfeeding definition*

Table S5: Multivariate adjusted analyses assessing breastfeeding and parent reports of hospitalizations from infection using multiple imputations to deal with missing measurements on familial or health characteristics ( $n = 11,238$ )

|                                           | <i>Parental-report of hospitalisations from infection</i> |                    |                              |                    |                    |                    |                    |
|-------------------------------------------|-----------------------------------------------------------|--------------------|------------------------------|--------------------|--------------------|--------------------|--------------------|
|                                           | Number of events (ref = None)                             |                    | Total duration (ref = Never) |                    | Causes             |                    |                    |
|                                           | 1                                                         | ≥ 2                | 1-3 nights                   | ≥ 4 nights         | Fever              | Gastroint. Inf.    | Bronchiolitis      |
| <b>Any breastfeeding duration</b>         |                                                           |                    |                              |                    |                    |                    |                    |
| Never                                     | 1 [Ref]                                                   | 1 [Ref]            | 1 [Ref]                      | 1 [Ref]            | 1 [Ref]            | 1 [Ref]            | 1 [Ref]            |
| <1 month                                  | 1.08 [0.87 ; 1.34]                                        | 1.09 [0.81 ; 1.45] | 1.16 [0.87 ; 1.54]           | 0.99 [0.74 ; 1.32] | 1.29 [0.89 ; 1.86] | 1.32 [0.99 ; 1.75] | 0.89 [0.66 ; 1.19] |
| 1 to < 3 months                           | 1.16 [0.93 ; 1.44]                                        | 1.08 [0.80 ; 1.46] | 1.14 [0.85 ; 1.53]           | 1.03 [0.77 ; 1.38] | 1.44 [1.00 ; 2.08] | 0.87 [0.63 ; 1.21] | 1.17 [0.88 ; 1.54] |
| 3 to < 6 months                           | 1.08 [0.87 ; 1.33]                                        | 0.93 [0.69 ; 1.26] | 1.26 [0.96 ; 1.66]           | 0.85 [0.63 ; 1.15] | 1.05 [0.72 ; 1.53] | 1.00 [0.74 ; 1.36] | 1.04 [0.78 ; 1.37] |
| ≥ 6 months                                | 0.89 [0.72 ; 1.10]                                        | 0.82 [0.61 ; 1.11] | 0.95 [0.72 ; 1.27]           | 0.71 [0.53 ; 0.95] | 1.06 [0.74 ; 1.52] | 0.92 [0.68 ; 1.25] | 0.80 [0.61 ; 1.06] |
| <b>Predominant breastfeeding duration</b> |                                                           |                    |                              |                    |                    |                    |                    |
| Never                                     | 1 [Ref]                                                   | 1 [Ref]            | 1 [Ref]                      | 1 [Ref]            | 1 [Ref]            | 1 [Ref]            | 1 [Ref]            |
| <1 month                                  | 1.17 [0.96 ; 1.42]                                        | 1.01 [0.84 ; 1.43] | 1.23 [0.96 ; 1.59]           | 1.05 [0.81 ; 1.36] | 1.17 [0.85 ; 1.62] | 1.23 [0.95 ; 1.60] | 1.21 [0.94 ; 1.55] |
| 1 to < 3 months                           | 1.10 [0.90 ; 1.34]                                        | 0.95 [0.72 ; 1.26] | 1.01 [0.78 ; 1.32]           | 0.97 [0.75 ; 1.27] | 1.27 [0.92 ; 1.76] | 1.01 [0.76 ; 1.33] | 1.01 [0.78 ; 1.32] |
| 3 to < 6 months                           | 0.97 [0.78 ; 1.19]                                        | 0.79 [0.59 ; 1.07] | 1.07 [0.82 ; 1.41]           | 0.66 [0.49 ; 0.90] | 0.83 [0.57 ; 1.19] | 0.80 [0.59 ; 1.10] | 0.99 [0.75 ; 1.31] |
| ≥ 6 months                                | 0.90 [0.69 ; 1.17]                                        | 0.89 [0.62 ; 1.28] | 1.09 [0.78 ; 1.53]           | 0.66 [0.45 ; 0.96] | 0.90 [0.58 ; 1.40] | 0.83 [0.56 ; 1.23] | 0.86 [0.61 ; 1.23] |

OR [CI 95%] multinomial logistic regressions adjusted for maternal age at first child, education level, employment status, smoking status during pregnancy and pre-pregnancy BMI, household monthly income per consumption unit, household composition, caesarean section and infant's sex, gestational age, birth order and age at first attendance to shared childcare facility, recruitment wave, maternity unit size and level, and mother's region of residence

Analyses were performed separately for each breastfeeding definition



Table S6: Multivariate adjusted analyses assessing breastfeeding and parent reports of bronchiolitis events, otitis events, and antibiotic use using multiple imputations to deal with missing measurements on familial or health characteristics ( $n = 11,238$ )

|                                           | <i>Parental-report</i>               |                    |                              |                                 |                    |                    |
|-------------------------------------------|--------------------------------------|--------------------|------------------------------|---------------------------------|--------------------|--------------------|
|                                           | Bronchiolitis events<br>(ref = None) |                    | Otitis events<br>(ref = < 3) | Antibiotic use<br>(ref = never) |                    |                    |
|                                           | 1 – 2                                | ≥ 3                | ≥ 3                          | Once                            | 2 to 3 times       | > 3 times          |
| <b>Any breastfeeding duration</b>         |                                      |                    |                              |                                 |                    |                    |
| Never                                     | 1 [Ref]                              | 1 [Ref]            | 1 [Ref]                      | 1 [Ref]                         | 1 [Ref]            | 1 [Ref]            |
| <1 month                                  | 1.08 [0.94 ; 1.25]                   | 1.19 [0.97 ; 1.46] | 1.09 [0.95 ; 1.26]           | 1.01 [0.82 ; 1.23]              | 1.04 [0.86 ; 1.27] | 1.11 [0.93 ; 1.31] |
| 1 to < 3 months                           | 1.11 [0.96 ; 1.28]                   | 1.01 [0.89 ; 1.37] | 1.11 [0.97 ; 1.28]           | 1.02 [0.83 ; 1.24]              | 0.94 [0.77 ; 1.15] | 0.95 [0.80 ; 1.13] |
| 3 to < 6 months                           | 1.19 [1.04 ; 1.37]                   | 1.23 [1.00 ; 1.50] | 1.09 [0.95 ; 1.24]           | 0.98 [0.81 ; 1.18]              | 0.78 [0.64 ; 0.94] | 0.80 [0.68 ; 0.94] |
| ≥ 6 months                                | 1.15 [1.01 ; 1.31]                   | 0.96 [0.78 ; 1.17] | 1.01 [0.88 ; 1.15]           | 0.79 [0.66 ; 0.95]              | 0.70 [0.58 ; 0.83] | 0.63 [0.54 ; 0.73] |
| <b>Predominant breastfeeding duration</b> |                                      |                    |                              |                                 |                    |                    |
| Never                                     | 1 [Ref]                              | 1 [Ref]            | 1 [Ref]                      | 1 [Ref]                         | 1 [Ref]            | 1 [Ref]            |
| <1 month                                  | 1.10 [0.97 ; 1.25]                   | 1.18 [0.98 ; 1.43] | 1.03 [0.91 ; 1.17]           | 1.09 [0.91 ; 1.30]              | 1.08 [0.91 ; 1.29] | 0.98 [0.84 ; 1.14] |
| 1 to < 3 months                           | 1.15 [1.01 ; 1.31]                   | 1.13 [0.93 ; 1.37] | 1.01 [0.89 ; 1.15]           | 0.91 [0.76 ; 1.09]              | 0.83 [0.69 ; 0.99] | 0.85 [0.73 ; 0.99] |
| 3 to < 6 months                           | 1.11 [0.97 ; 1.26]                   | 0.99 [0.81 ; 1.21] | 0.98 [0.86 ; 1.11]           | 0.90 [0.75 ; 1.07]              | 0.72 [0.60 ; 0.86] | 0.67 [0.57 ; 0.78] |
| ≥ 6 months                                | 0.96 [0.82 ; 1.12]                   | 0.83 [0.65 ; 1.07] | 0.99 [0.84 ; 1.16]           | 0.84 [0.68 ; 1.04]              | 0.71 [0.57 ; 0.88] | 0.62 [0.51 ; 0.74] |

OR [CI 95%] multinomial logistic regressions adjusted for maternal age at first child, education level, employment status, smoking status during pregnancy and pre-pregnancy BMI, household monthly income per consumption unit, household composition, caesarean section and infant's sex, gestational age, birth order and age at first attendance to shared childcare facility, recruitment wave, maternity unit size and level, and mother's region of residence

Analyses were performed separately for each breastfeeding definition
